# Supplementary material for: Synthesis of a MnS/NixSy composite with nanoparticles coated on hexagonal sheet structures as an advanced electrode material for asymmetric supercapacitors
Source: Royal Society of Chemistry journal article supplement (doi:10.1039/c8ra02063a), 2018-01-01
Supplement: c8ra02063a1.pdf [file c8ra02063a1.pdf]

## Supporting Information

### **Synthesis of MnS/Ni<sub>x</sub>S<sub>y</sub> Composite with Nanoparticles coated on Hexagon Sheets Structures as An Advanced Electrode Material for Asymmetric Supercapacitors**

Qing Pan <sup>a,1</sup>, Xijia Yang <sup>b,1</sup>, Xiaohong Yang <sup>a</sup>, Lianfeng Duan <sup>b</sup>, Lijun Zhao <sup>a,\*</sup>

*<sup>a</sup> Key Laboratory of Automobile Materials (Jilin University), Ministry of Education, College of Materials Science and Engineering, Nanling Campus, Changchun, 130025, P. R. China.*

*<sup>b</sup>Key Laboratory of Advanced Structural Materials, Ministry of Education, and Department of Materials Science and Engineering, Changchun University of Technology, Changchun 130012, China*

\*E-mail address: [lijunzhao@jlu.edu.cn](mailto:lijunzhao@jlu.edu.cn)

Fax: +86-431-85095876

## Supporting Figures

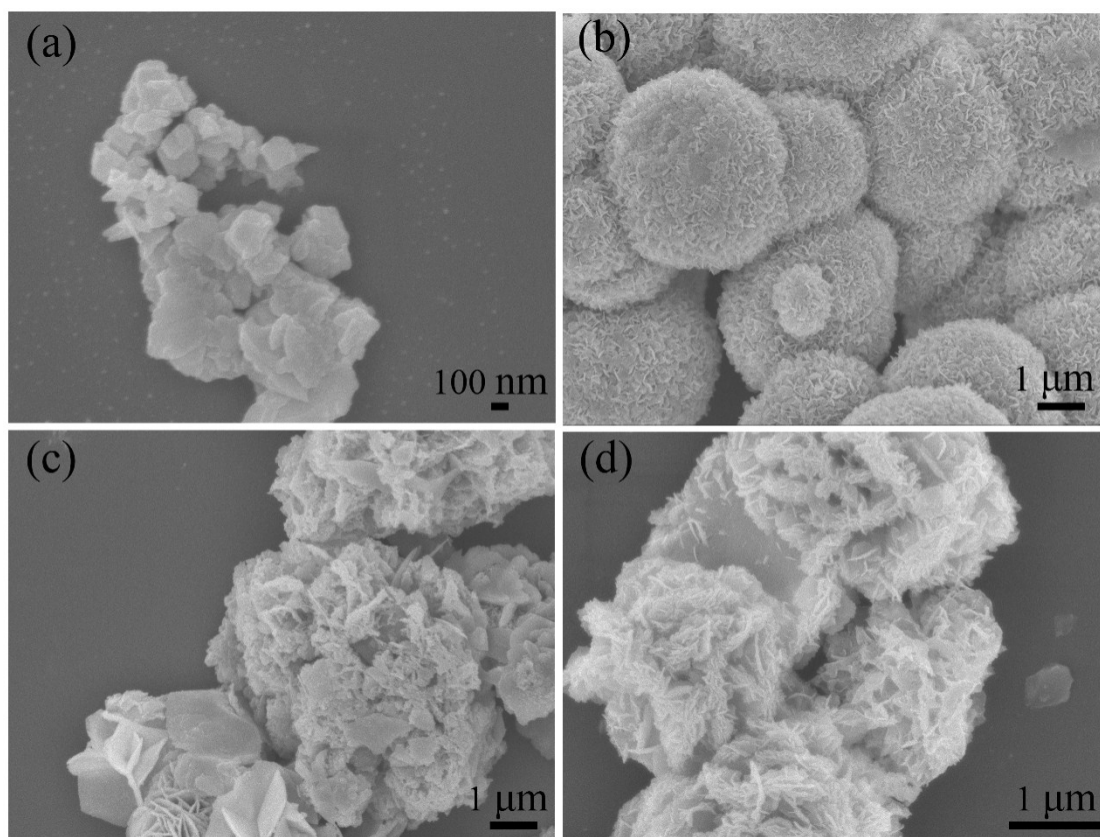

**Fig. S1** FE-SEM images of (a) MS; (b) NS; (c) NMS-1 (1:2) and (d) NMS-2 (1:1).

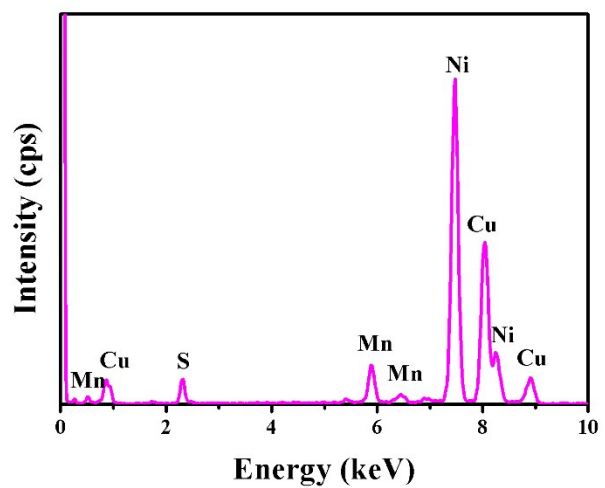

**Fig. S2** EDX spectrum of the NMS.

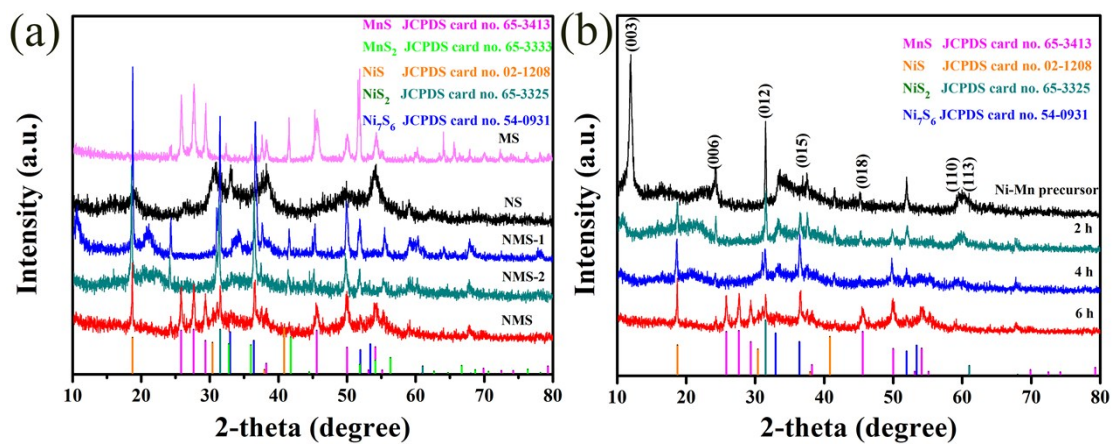

**Fig. S3** (a) XRD patterns of the as-prepared NS, MS, NMS, NMS-1 and NMS-2 electrode; (b) XRD patterns of the as-prepared Ni-Mn precursor and NMS samples with different sulfurization time (2, 4 and 6 h).

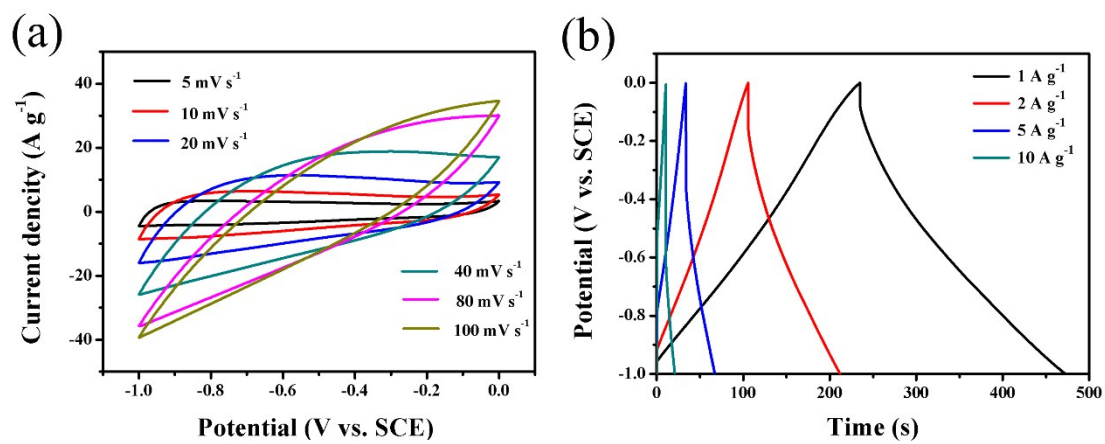

**Fig. S4** (a) CV curves at various scan rates; (b) galvanostatic charge-discharge curves at different current density of AC.
